# Supplementary material for: Automation of cell culture assays using a 3D-printed servomotor-controlled microfluidic valve system
Source: Royal Society of Chemistry journal article supplement (doi:10.1039/d2lc00629d), 2022-01-01

## Research Article

# *Automation of Cell Culture Assays using a 3D-printed Servomotor-controlled Microfluidic Valve System*

Steffen Winkler<sup>1</sup>, Jannik Menke<sup>1</sup>, Katharina V. Meyer<sup>1</sup>, Carlotta Kortmann<sup>1</sup>, Janina Bahnemann<sup>2\*</sup>

<sup>1</sup> Institute of Technical Chemistry, Leibniz University Hannover, Hannover, Germany

<sup>2</sup> Institute of Physics, Augsburg University, Augsburg, Germany

**Correspondence:** Prof. Dr. Janina Bahnemann (janina.bahnemann@uni-a.de), Institute of Physics, Augsburg University, Universitätsstraße 1, 86159 Augsburg, Germany.

## Supporting Information

### User Information for Operation of the 3D-printed Microfluidic Valve System

The protocols for servo opening and closure as well as pump steps of the 3D-printed microfluidic valve system are attached separately as .py and .xlsx files. The .py script files can be opened by integrated development environments such as the program Thonny. For operation of the “pumpsystem\_LabOnAChip.py” file for the proof-of-concept experiments, the programming bibliographies stated at the beginning of the script must be installed. The .xlsx files include the parameters used for each sequence of a specific protocol, such as servo number, servo position, pump volumes and more, while the “Commands.py” files include the main commands for the servos and the pumps. All files must be located in the same folder. When using different pumps or servos, the new commands must be imported into the main script. The script automatically determines the next sequence by reading the starting time of the .xlsx file. Thus, the sequences do not have to be sorted according to the “sequence start” parameter in the .xlsx file, but must follow the given matrix.

**Table S.1:** Mask parameters for automated image processing of cell confluence using IncuCyte 2021C software.

| Parameter                     | Value              |
|-------------------------------|--------------------|
| Segmentation                  | 0.5                |
| Hole Fill ( $\mu\text{m}^2$ ) | 0,0000             |
| Adjust size (pixels)          | -4                 |
| Area ( $\mu\text{m}^2$ )      | min: 120    max: - |
| Eccentricity                  | min: -    max: -   |

**Table S.2:** Number of valve actuations including opening and closing until failure of the corresponding servomotors. Cases where no failure was observed until the end of the experiment were actuated 5608 times.

| Treatment                                                                    | Number of valve actuations until failure |            |            |            |
|------------------------------------------------------------------------------|------------------------------------------|------------|------------|------------|
|                                                                              | Valve 1                                  | Valve 2    | Valve 3    | Valve 4    |
| No treatment                                                                 | 1561                                     | no failure | no failure | no failure |
| Heat steam sterilized                                                        | no failure                               | no failure | 4128       | 3000       |
| Heat steam sterilized<br>+ incubation in ddH <sub>2</sub> O<br>(37 °C, 28 d) | 4071                                     | no failure | no failure | no failure |

**Table S.3:** Parameters used for the microfluidic valve system during the proof-of-concept cell culture cytotoxicity assay. (Seq. No: Number of a single sequence including valve opening, pumping and valve closure; Sequence start: Starting time as passed time since the start of the script; Servo No.: Number of the servomotor opened during the respective sequence, where servo 1-8 are connected to the well outlets and servo number 9 to the waste outlet for rinsing steps; Flow rate\_Pump1/2: Flow rates of the channels with (Pump2) and without (Pump1) camptothecin)

| Seq. No. | Sequence start<br>(s) | Servo No. | Flow rate_Pump1<br>( $\mu\text{L} \cdot \text{min}^{-1}$ ) | Flow rate_Pump2<br>( $\mu\text{L} \cdot \text{min}^{-1}$ ) |
|----------|-----------------------|-----------|------------------------------------------------------------|------------------------------------------------------------|
| 1        | 1                     | 9         | 500                                                        | 0                                                          |
| 2        | 131                   | 8         | 500                                                        | 0                                                          |
| 3        | 153                   | 9         | 0                                                          | 125                                                        |
| 4        | 164                   | 9         | 492.2                                                      | 7.8                                                        |
| 5        | 294                   | 7         | 492.2                                                      | 7.8                                                        |
| 6        | 316                   | 9         | 484.3                                                      | 15.7                                                       |
| 7        | 446                   | 6         | 484.3                                                      | 15.7                                                       |
| 8        | 468                   | 9         | 468.7                                                      | 31.3                                                       |
| 9        | 598                   | 5         | 468.7                                                      | 31.3                                                       |
| 10       | 620                   | 9         | 437.5                                                      | 62.5                                                       |
| 11       | 750                   | 4         | 437.5                                                      | 62.5                                                       |
| 12       | 772                   | 9         | 375                                                        | 125                                                        |
| 13       | 842                   | 3         | 375                                                        | 125                                                        |
| 14       | 864                   | 9         | 250                                                        | 250                                                        |
| 15       | 934                   | 2         | 250                                                        | 250                                                        |
| 16       | 956                   | 9         | 0                                                          | 500                                                        |
| 17       | 1026                  | 1         | 0                                                          | 500                                                        |
| 18       | 1048                  | 9         | 500                                                        | 0                                                          |

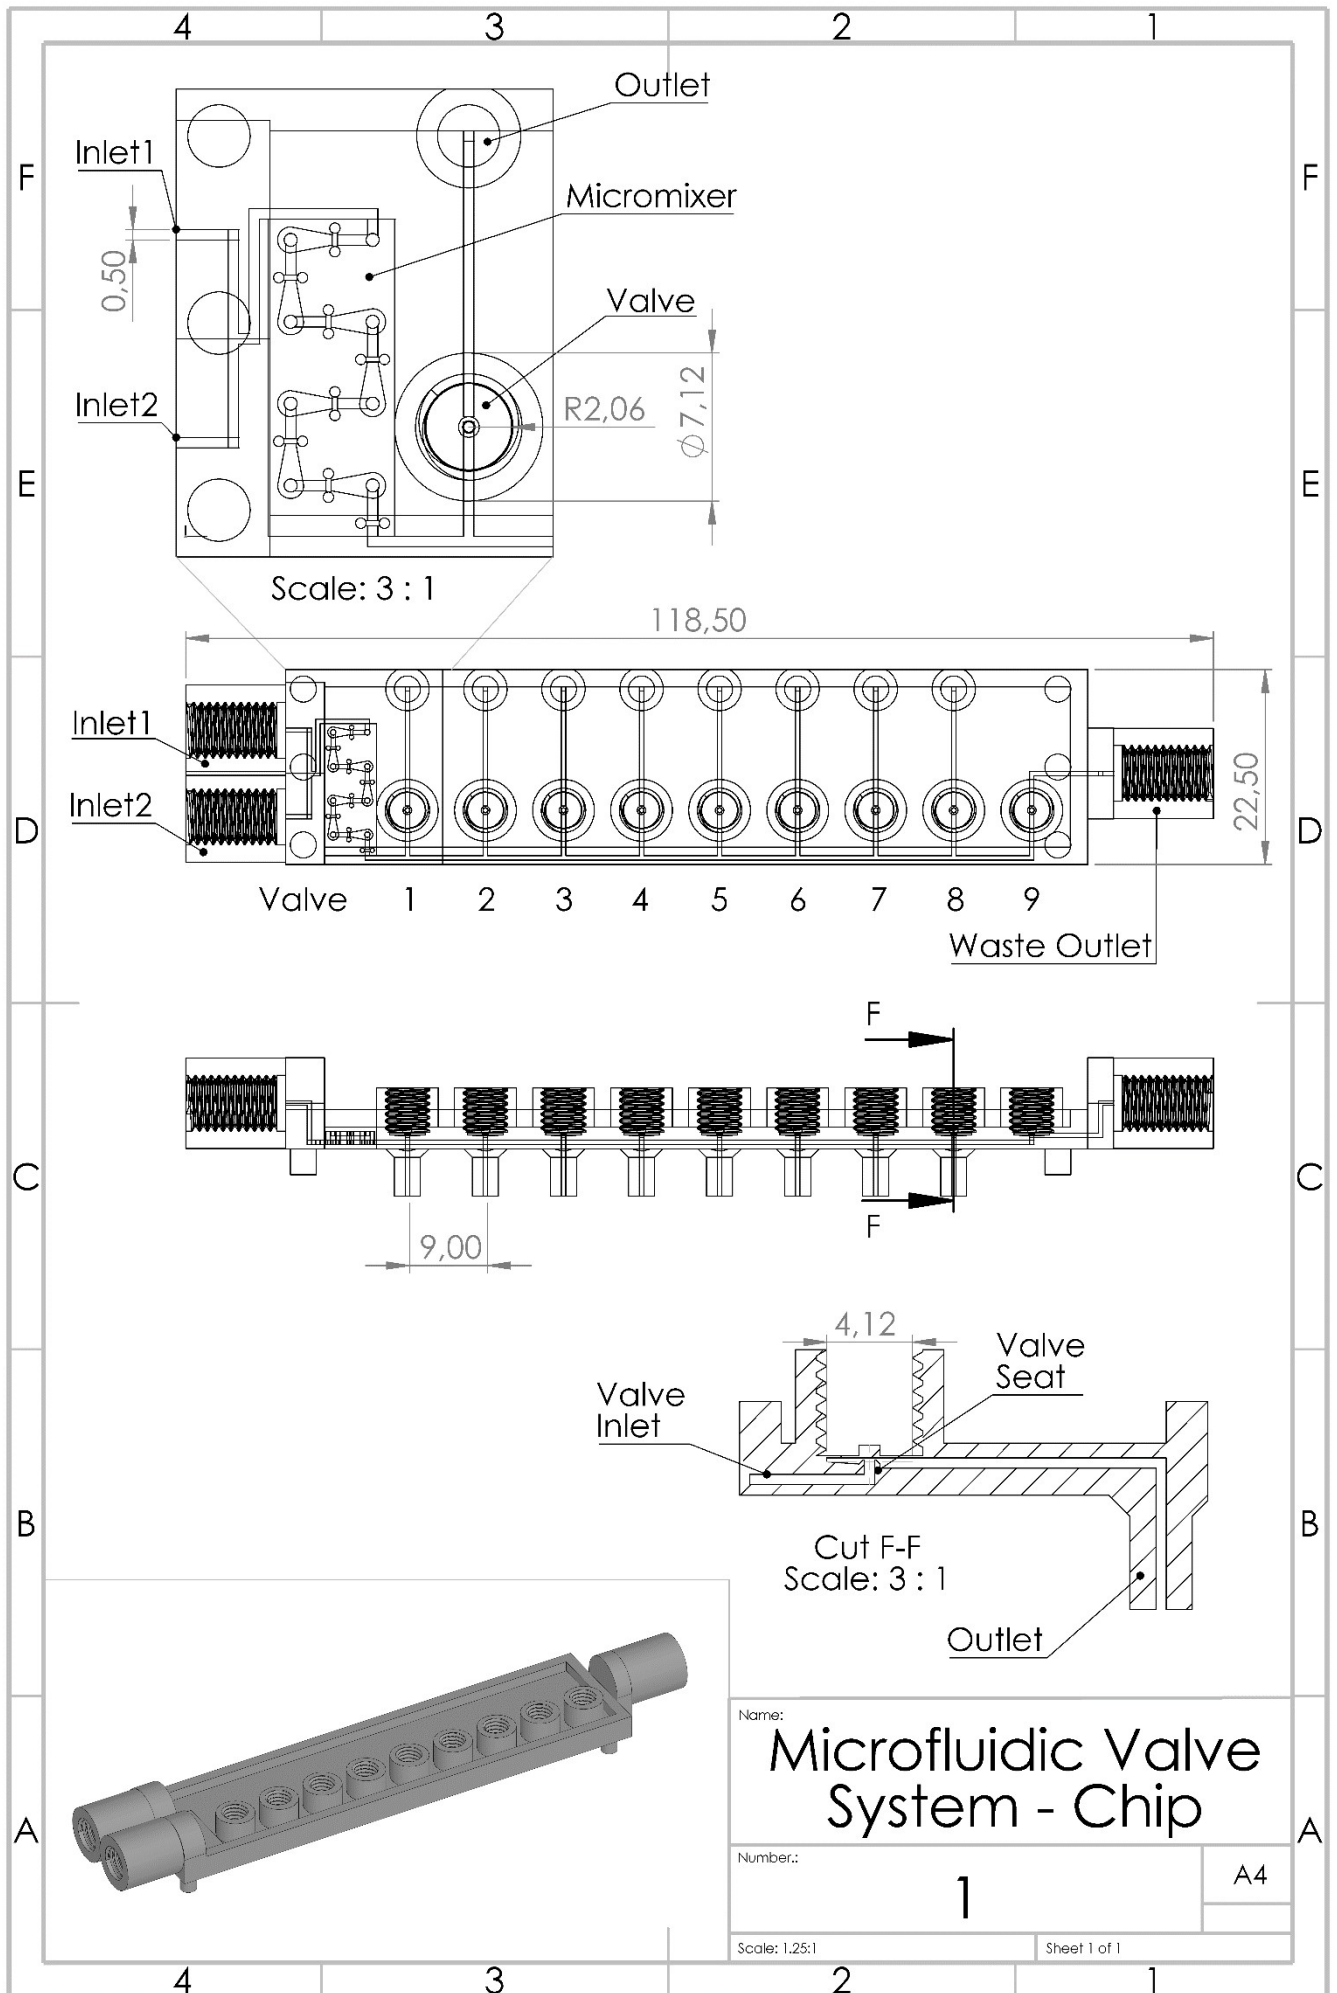

Figure S.1: Technical drawings of the 3D-printed microfluidic valve system.

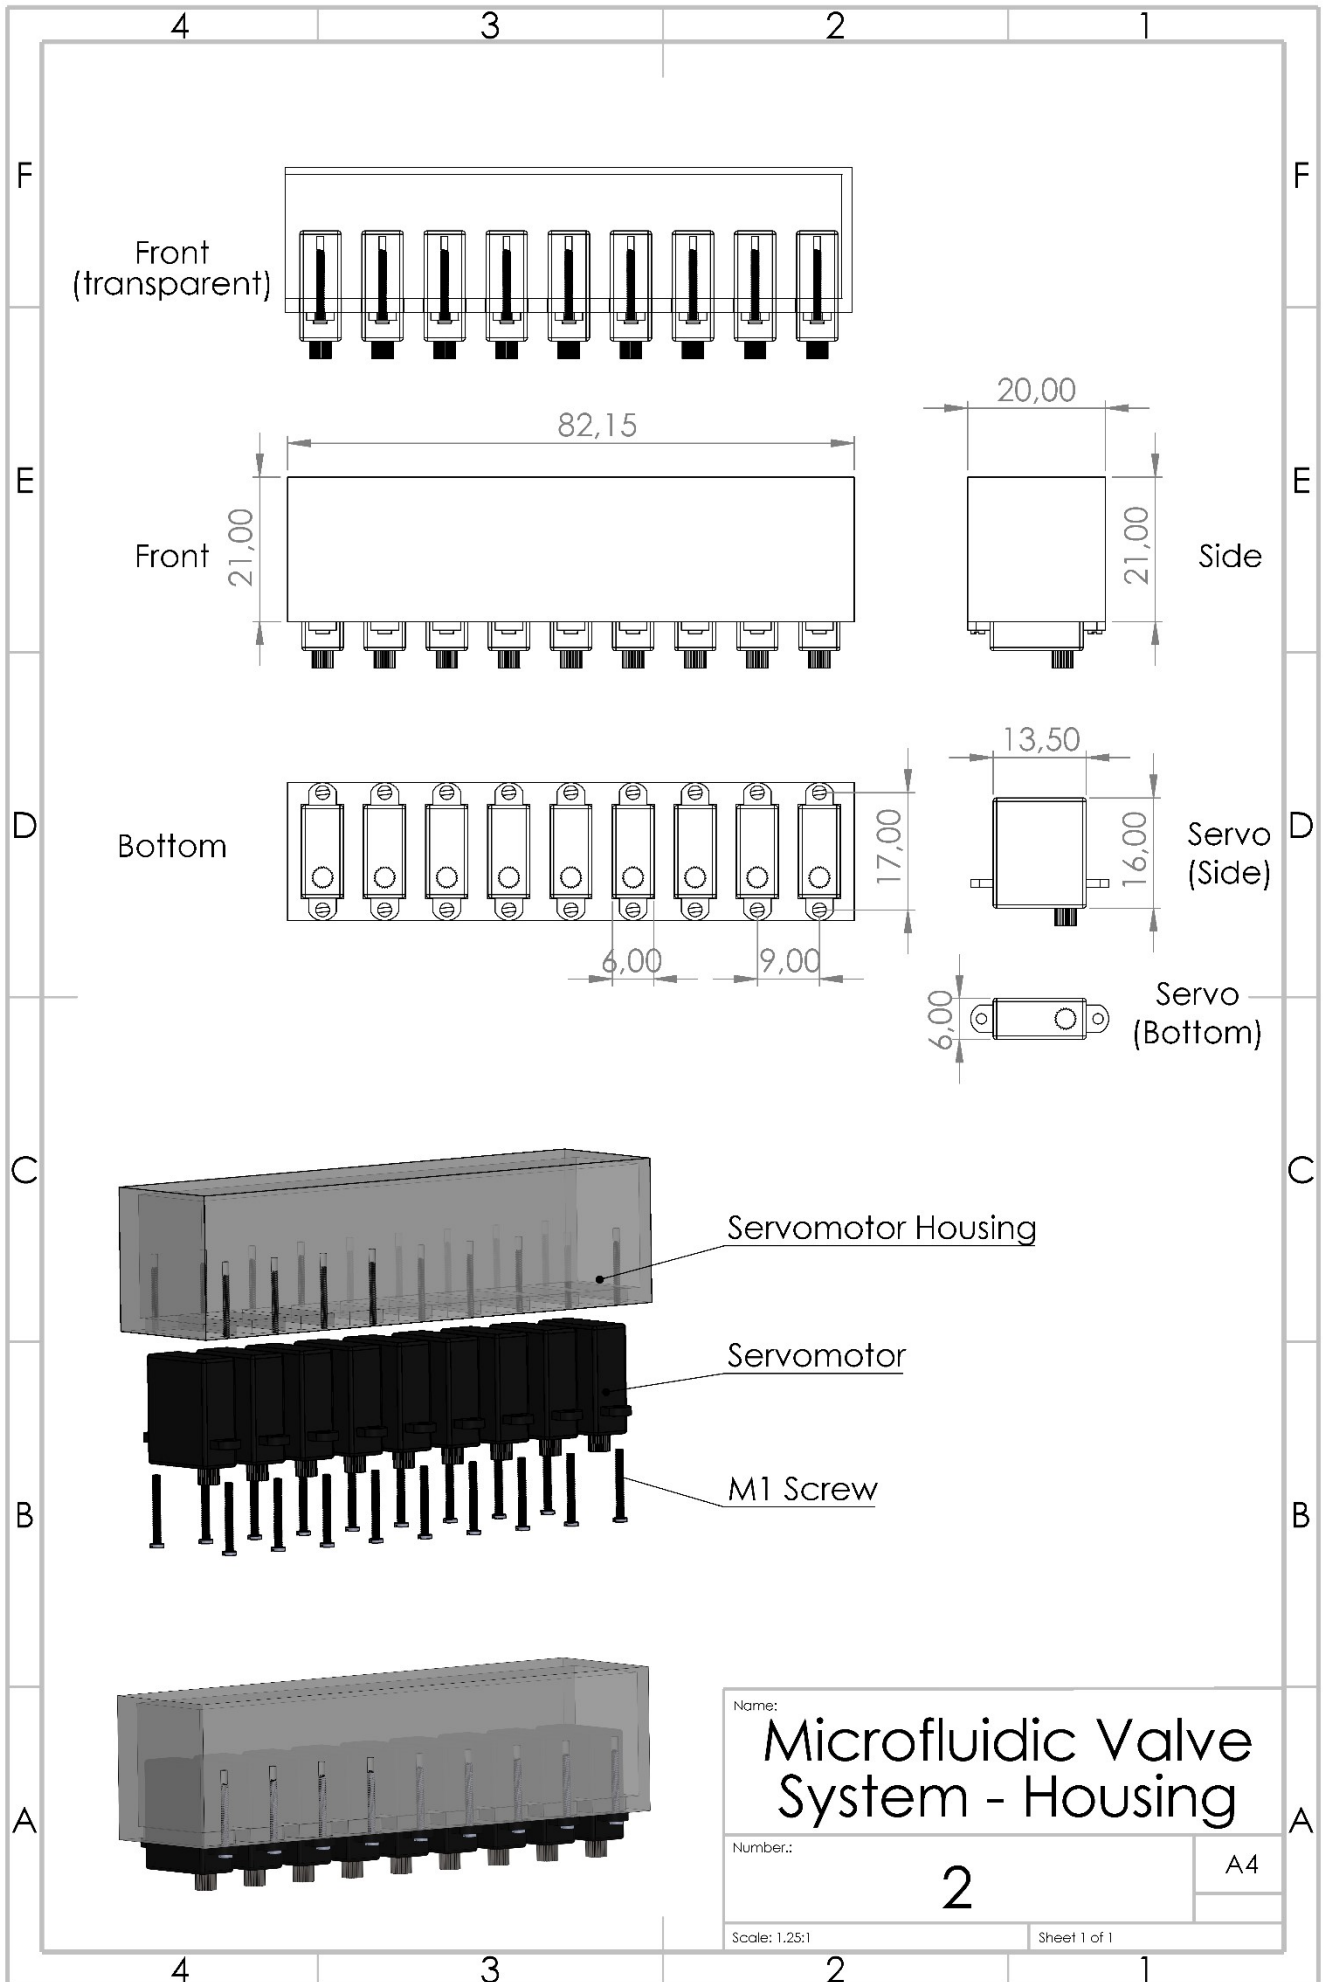

Supplement: d2lc00629d4.pdf [file d2lc00629d4.pdf]
