# Supplementary material for: Automation of cell culture assays using a 3D-printed servomotor-controlled microfluidic valve system
Source: Royal Society of Chemistry journal article supplement (doi:10.1039/d2lc00629d), 2022-01-01
Supplement: d2lc00629d3.zip [file Pumpsystem_Sequence_Parameters.xlsx]

## Sheet: Tabelle1
Sequence start in s	Servo nr	Flow rate_Pump1in µL/min	Flow rate_Pump2 in µL/min	Flow rate_Pump3 in µL/min	Incubation time in s	Pumped volume in µL	Pump duration in s		Duration per sequence (2 s spare time incl.): 10 s + pump duration
1	9	500	0	0		1000	120
131	8	500	0	0		100	12
153	9	0	125	0		10	4.8
164	9	492.2	7.8	0		1000	120
294	7	492.2	7.8	0		100	12
316	9	484.3	15.7	0		1000	120
446	6	484.3	15.7	0		100	12
468	9	468.7	31.3	0		1000	120
598	5	468.7	31.3	0		100	12
620	9	437.5	62.5	0		1000	120
750	4	437.5	62.5	0		100	12
772	9	375	125	0		500	60
842	3	375	125	0		100	12
864	9	250	250	0		500	60
934	2	250	250	0		100	12
956	9	0	500	0		500	60
1026	1	0	500	0		100	12
1048	9	500	0	0		1000	120
